# Supplementary material for: LINC01270 Regulates the NF-κB-Mediated Pro-inflammatory Response via the miR-326/LDOC1 Axis in THP-1 Cells
Source: Preprints.org preprint supplement (doi:10.20944/preprints202406.1508.v1), 2024-06-24
Supplement: Supplementary file 1 [file supplementary]

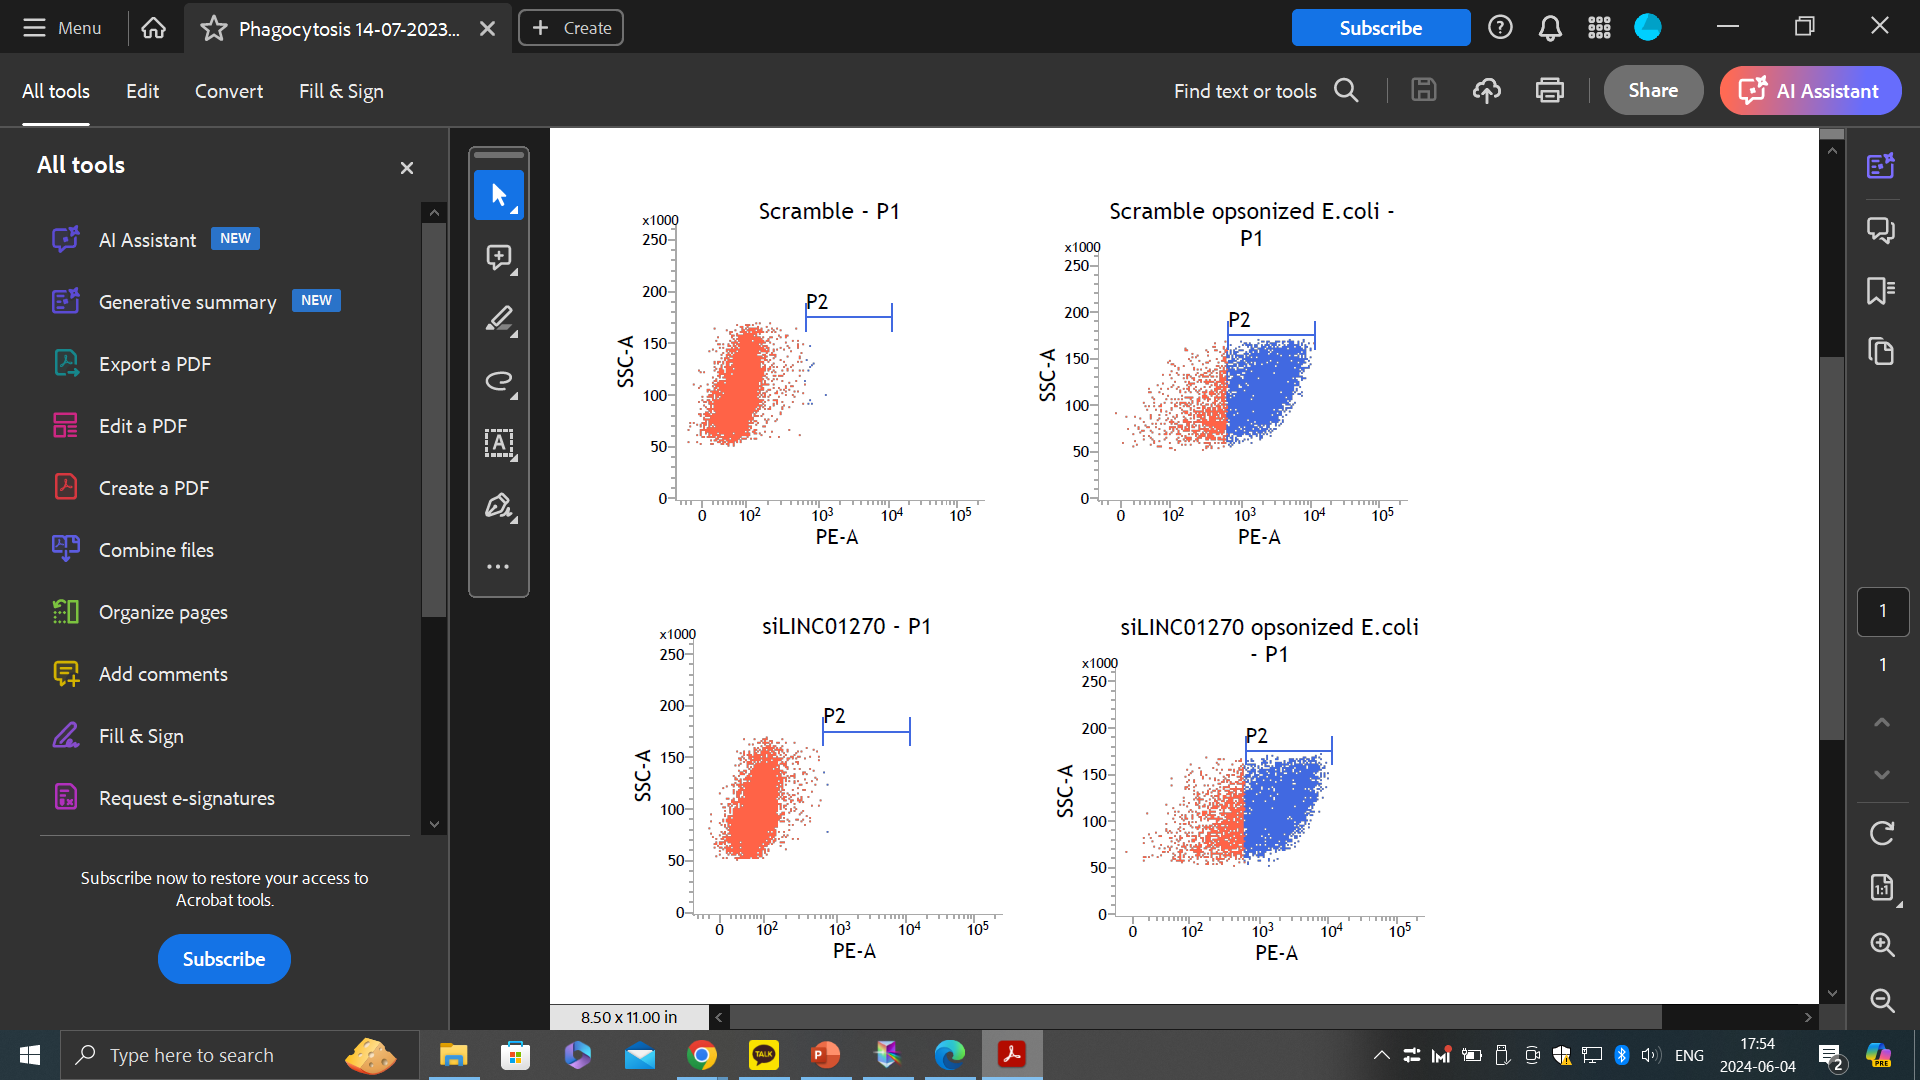


**A**

**Figure S1. LINC01270 attenuation has no effect on phagocytic activity of THP-1 cells.** (A) Cells transfected with either scramble or siLINC01270 were treated with opsonized *Escherichia coli* (strain K-12) BioParticles at a concentration of 20μg/ml for 3h. Phagocytic activity was measured by flow cytometry.
